# Supplementary material for: Matrix Metallopeptidase-Gene Signature Predicts Stage I Lung Adenocarcinoma Survival Outcomes
Source: MDPI journal article supplement (doi:10.3390/ijms24032382), 2023-01-25
Supplement: s1 [file s1]

# **Matrix Metalloproteinases-Gene Signature Predicts Stage I Lung Adenocarcinoma Survival Outcomes**

Chia-Hsin Liu and Yuanpu Peter Di

ONLINE DATA SUPPLEMENT

**A** GSE31210 Stage I-II Lung ADC

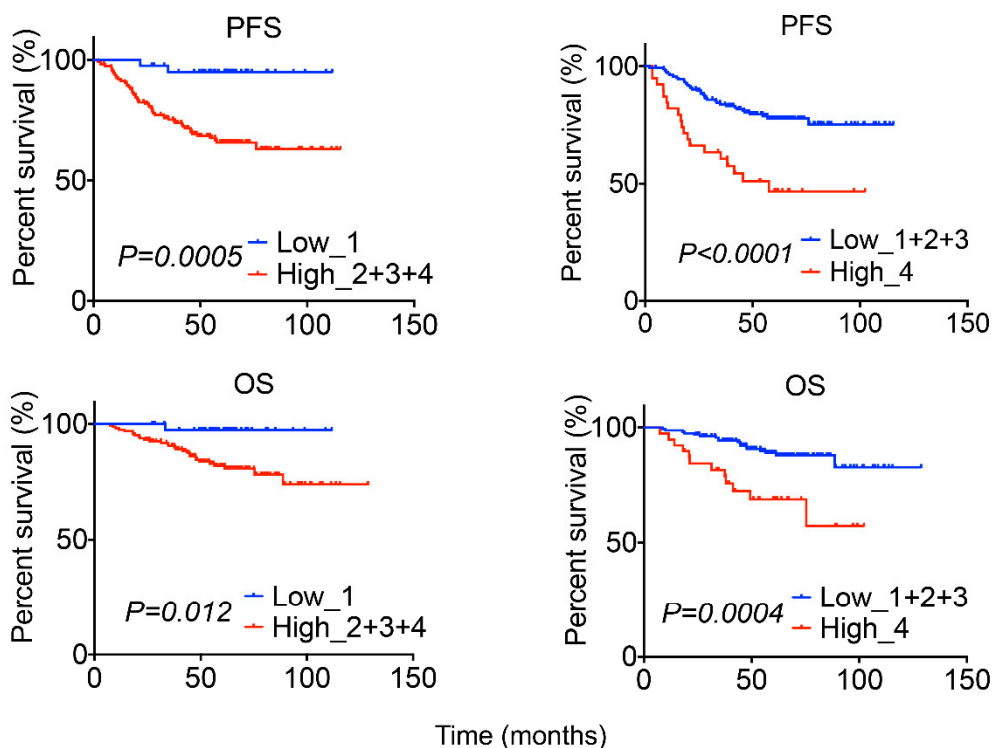

**B** GSE31210 Stage I Lung ADC

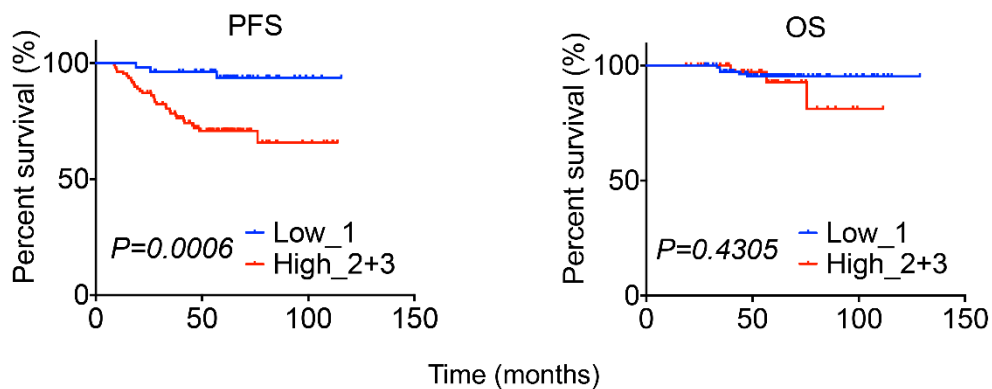

**Figure S1.** MMPs-gene cluster and 36-gene MMP signature predict survival outcome in GSE31210 cohort. Subgroups of patients with lung adenocarcinoma were determined by unsupervised hierarchical clustering. **(A)** Kaplan-Meier survival analysis based on MMPs-gene cluster in different subgroups. **(B)** Kaplan-Meier survival analysis based on 36-gene MMP signature in different subgroups.  $P$  value was based on the log-rank test.

## A TCGA Lung ADC

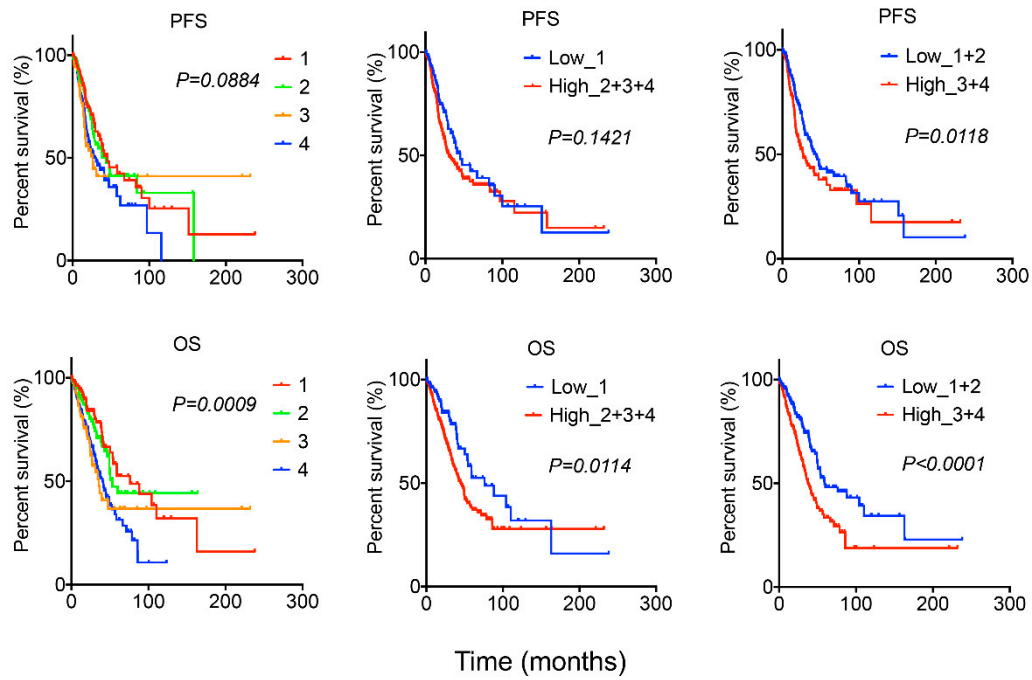

## B TCGA Stage I Lung ADC

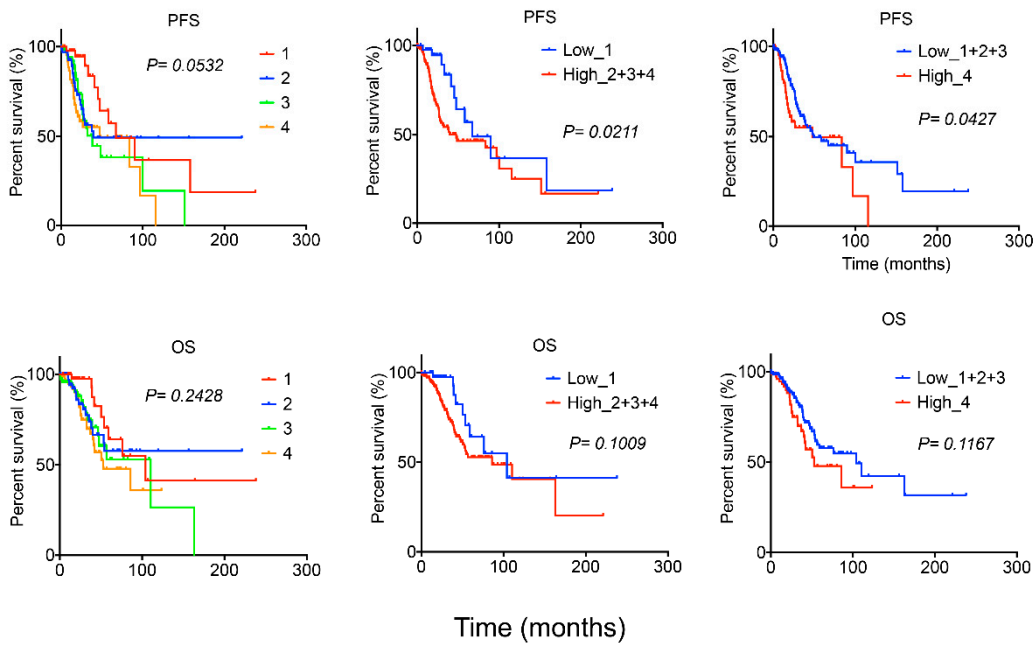

**Figure S2.** MMPs-gene cluster and 36-gene MMP signature predict survival outcome in TCGA cohort. Subgroups of patients with lung adenocarcinoma were determined by unsupervised hierarchical clustering. **(A)** Kaplan-Meier survival analysis based on MMPs-gene cluster in different subgroups. **(B)** Kaplan-Meier survival analysis based on 36-gene MMP signature in different subgroups. P value was based on the log-rank test.

**Table S1.** Clinical Characteristics of GSE31210 Stage I-II Lung Adenocarcinoma Cohort .

| Characteristics                | N (%)           |
|--------------------------------|-----------------|
| Subjects, <i>n</i>             | 226             |
| Sex, M/F, <i>n</i> (%)         | 105/121 (46/54) |
| Age, yr, mean $\pm$ SD         | 60 $\pm$ 7      |
| pTNM stages*                   |                 |
| IA                             | 114 (50)        |
| IB                             | 54 (24)         |
| II                             | 58 (26)         |
| Smoking status                 |                 |
| Non-smoker                     | 115 (51)        |
| Ever-smoker                    | 111 (49)        |
| Mutation status                |                 |
| EGFR_MUT                       | 127 (56)        |
| KRAS_MUT                       | 20 (9)          |
| ALK_Fusion                     | 11 (5)          |
| KRAS/EGFR/AKL_WT               | 68 (30)         |
| Exclude for prognosis analysis | 22 (9.7)        |

Clinical–pathologic characteristics of GSE31210 lung adenocarcinoma cohort (n=226) were evaluated in this study. 22 cases were excluded for prognosis analysis due to incomplete resection or adjuvant therapy.

\*According to the 7th edition of the TNM classification for lung cancer. *Definition of abbreviations:* ALK= Anaplastic lymphoma kinase; EGFR= epidermal growth factor receptor; MUT = mutation; pTNM stages = pathologic TNM stages of malignant tumors; WT = wild type.

**Table S2.** Gene List of MMP related Gene Cluster and Signature.

| Name                               | Genes                                                                                                                                                                                                                                                                                                                                                                                                                                                                                                                                                                                                                                                                                                                                                                                                                                                                                                                                                                                                                                                                                                                             |
|------------------------------------|-----------------------------------------------------------------------------------------------------------------------------------------------------------------------------------------------------------------------------------------------------------------------------------------------------------------------------------------------------------------------------------------------------------------------------------------------------------------------------------------------------------------------------------------------------------------------------------------------------------------------------------------------------------------------------------------------------------------------------------------------------------------------------------------------------------------------------------------------------------------------------------------------------------------------------------------------------------------------------------------------------------------------------------------------------------------------------------------------------------------------------------|
| GSE31210 MMPs-gene cluster (n=150) | COL11A1, MMP13, MMP12, GJB2, CYP24A1, GREM1, MMP11, MMP1, IGFL2, MMP3, MUC16, MMP9, CTHRC1, COL17A1, KIF26B, GPR87, ZIC2, IBSP, KCNN4, THBS2, C15orf48, FAM83A, S100A2, SULF1, EPYC, PPAPDC1A, ALPK2, PITX1, SLC2A1, ADAM12, STEAP1, EGLN3, RHOV, FHL2, LYPD1, TCN1, SPP1, KRT15, KRT6A, CDCA8, TOP2A, UBE2T, EXO1, CDC45, E2F8, RAD54L, AKR1B10, ANLN, ARL14, HMMR, MUC5B, CLDN10-AS1, DLGAP5, MB, PTPRH, DEPDC1B, RRM2, ERCC6L, MELK, MYBL2, P2RY6, CLDN1, LRRC15, DEPDC1, IGF2BP3, KIAA0101, S100P, LCN2, KRT6A, TPX2, SCG5, BUB1B, LY6D, CENPA, CENPM, CEP55, ORC1, KIF4A, IL4I1, SLCO5A1, NEIL3, PSAT1, BPIFA1, MND1, NUF2, LINC00525, CHST6, ASPM, ORC6, ZG16B, FOXM1, KIF2C, FAM111B, GINS1, BIRC5, NCAPH, TRAIP, STIL, CYP26A1, KRT16, KIFC1, TTK, SEMA4B, HJURP, SYNGR3, ALDH3B2, ZWINT, CCNB1, APELA, KIF20A, CENPF, NCAPG, KRT14, KRT17, KIF14, SPAG4, LINC00857, NUSAP1, NEK2, PKIB, FAM101A, GPR84, CKAP2L, UHRF1, CFB, CKMT1B, PLAU, BRIP1, SPC25, CENPE, LYPD3, SRPX2, CDC6, DEPDC1-AS1, PBK, RALGPS2, KIF18B, SKA3, LOC100129029, CDCA3, CDKN3, TIMP1, CDC25C, KIAA1024, FUT9, UBE2C, PRPF31, CCNB2, MKI67, MFAP5 |
| TCGA MMPs-gene cluster (n=185)     | TMPRSS11E2, ABCA12, ABCA4, ABCC3, ACY3, ADAM12, ADAM28, ADAMDEC1, ADAMTS14, ADAMTS16, AIM2, AK3L1, ALPK2, ANKRD22, APCDD1L, ARNTL2, ATP10B, B3GNT3, B3GNT6, BARX2, BCL2L15, BMP8A, C11orf86, C15orf48, C1orf170, C1QTNF6, C20orf151, C2CD4A, C4orf7, C5orf46, C6orf222, C8orf73, C9orf84, CA9, CD19, CP, CBLC, CDH3, CEACAM5, CEACAM7, CILP2, COL10A1, COL11A1, COL17A1, COL1A1, COL22A1, COL3A1, COL7A1, COMP, CPNE4, CPXM1, CR2, CST1, CST2, CST4, CTHRC1, CXCL13, CXCL14, CYP24A1, CYP27C1, DERL3, DIO2, DNAJC22, DPEP1, EGLN3, EPHA10, EPHX4, EPN3, EPYC, FAM155B, FAM83A, FAP, FBXO32, FCRL5, FERMT1, FEZF1, FHL2, FLJ40330, FOXP3, GALNT14, GJB2, GJB6, GLB1L3, GOLM1, GPR115, GPR87, GREB1L, GREM1, GRHL3, HMGA2, HNF4G,                                                                                                                                                                                                                                                                                                                                                                                                   |

|                            |                                                                                                                                                                                                                                                                                                                                                                                                                                                                                                                                                                                                                                                                                                                                                                                  |
|----------------------------|----------------------------------------------------------------------------------------------------------------------------------------------------------------------------------------------------------------------------------------------------------------------------------------------------------------------------------------------------------------------------------------------------------------------------------------------------------------------------------------------------------------------------------------------------------------------------------------------------------------------------------------------------------------------------------------------------------------------------------------------------------------------------------|
|                            | HS6ST2, HTR3A, IBSP, IGFL2, IL11, IL1F5, IL1F7,<br>IL1RL2, IL20RB, IL22RA2, IL31RA, ITGA11, ITPKA,<br>JSRP1, KCNN4, KCNQ3, KDEL3, KIF26B, KPNA7,<br>KRT80, LGR4, LOC100131726, LOC285629,<br>LOC84740, LOC96610, LYPD1, METTL7B, MFI2,<br>MMP1, MMP10, MMP11, MMP12, MMP13, MMP3,<br>MMP9, MUC16, MYEOV, MYO3B, NETO1, NGEF,<br>NMU, NRK, OCIAD2, ONECUT1, ONECUT2,<br>OR51E1, OTX1, OVOL1, P4HA3, PADI1, PGLYRP4,<br>PHLDA2, PITX1, PLEK2, PLEKHN1, PODNL1,<br>PPAP2C, PPAPDC1A, PROM2, PRSS3, PTGES,<br>PVRL4, PVT1, RGS17, RHBDL2, RHOF, S100A2,<br>SHOX2, SLC22A18A5, SLC2A1, SLC2A5, SLC1B3,<br>SPRR1B, SPTBN2, STEAP1, STYK1, SULF1, SYT12,<br>TCN1, TFAP2A, THBS2, TMEM156, TMEM184A,<br>TMEM63C, TRIM15, TRIM31, TRPM8, VPREB3,<br>VSIG1, XAGE1D, XDH, XKRX, ZIC2, ZPLD1 |
| MMPs-gene signature (n=36) | COL11A1, MMP13, MMP12, GJB2, CYP24A1,<br>GREM1, MMP11, MMP1, IGFL2, MMP3, MUC16,<br>MMP9, CTHRC1,<br>COL17A1, KIF26B, GPR87, ZIC2, IBSP, KCNN4,<br>THBS2,<br>C15orf48, FAM83A, S100A2, SULF1, EPYC,<br>PPAPDC1A,<br>ALPK2, PITX1, SLC2A1, ADAM12, STEAP1, EGLN3,<br>RHOF, FHL2, LYPD1, TCN1                                                                                                                                                                                                                                                                                                                                                                                                                                                                                      |

The MMP gene clusters were determined from GSE31210 and TCGA lung adenocarcinoma cohort, respectively. The MMP common gene signature (n=36) was identified by the overlapping genes between GSE31210 and TCGA cohort MMP gene cluster. *Definition of abbreviations:* MMP = matrix metalloproteases.

**Table S3.** Major Pathways in 150-gene cluster from GSE31210 cohort by IPA.

| Ingenuity Canonical Pathways -log(p-value) |       | Molecules                                                   |
|--------------------------------------------|-------|-------------------------------------------------------------|
| Matrix Metalloproteases                    | 11.44 | MMP3,ADAM12,TIMP1,THBS2,MMP13,<br>MMP11,<br>MMP12,MMP9,MMP1 |
| HIF1 $\alpha$ Signaling                    | 5.56  | MMP3,SLC2A1,MMP13,EGLN3,MMP11,<br>MMP12,MMP9,MMP1           |
| Bladder Cancer Signaling                   | 4.28  | MMP3,MMP13,MMP11,MMP12,MMP9,M<br>MP1                        |
| Leukocyte Extravasation<br>Signaling       | 4.01  | MMP3,TIMP1,CLDN1,MMP13,MMP11,M<br>MP12,<br>MMP9,MMP1        |
| Granulocyte Adhesion and<br>Diapedesis     | 3.84  | MMP3,CLDN1,MMP13,MMP11,MMP12,M<br>MP9,<br>MMP1              |
| Oncostatin M Signaling                     | 3.67  | MMP3,MMP13,PLAU,MMP1                                        |
| Glioma Invasiveness Signaling              | 3.45  | RHOV,TIMP1,HMMR,PLAU,MMP9<br>MMP3,MMP13,MMP11,MMP12,MMP9,M  |
| Colonrectal Cancer Metastasis              | 3.36  | MP1,<br>BIRC5,RHOV                                          |

The MMP gene cluster, which contained 150 MMP related gene were determined from GSE31210 stage I-II lung adenocarcinoma cohort for Ingenuity canonical pathways (IPA) analysis. Ingenuity canonical pathways were combined according to the major function category and gene overlap. The enrichment *p*-values were obtained by Fisher Exact Test. Pathways were ranked within the category by  $-\log(p\text{-value})$  for the pathway.  $-\log(p\text{-value}) > 1.3$  with significance at  $p=0.05$ . *Definition of abbreviations:* ADC = adenocarcinoma; MMP = matrix metalloproteases.

**Table S4.** Clinical Characteristics of TCGA Lung Adenocarcinoma Cohort .

| Characteristics        | N (%)           |
|------------------------|-----------------|
| Subjects, <i>n</i>     | 517             |
| Sex, M/F, <i>n</i> (%) | 240/277 (46/54) |
| Age, yr, mean $\pm$ SD | 65 $\pm$ 13     |
| pTNM stages*           |                 |
| I                      | 277 (54)        |
| II                     | 122 (24)        |
| III                    | 84 (16)         |
| IV                     | 26 (5)          |
| NA                     | 8 (1)           |
| Smoking status         |                 |
| Non-smoker             | 76 (15)         |
| Ex-smoker              | 308 (60)        |
| Current-smoker         | 119 (23)        |
| NA                     | 14 (2)          |
| Mutation status        |                 |
| EGFR_MUT               | 66 (13)         |
| KRAS_MUT               | 154 (30)        |
| ALK_Fusion             | 5 (1)           |
| KRAS/EGFR/AKL_WT       | 285 (55)        |
| NA                     | 7 (1)           |
| Treatment              |                 |
| Surgery                | 386 (75)        |
| Radiotherapy           | 43 (8)          |
| Chemotherapy           | 155 (30)        |
| Targeted therapy       | 18 (3)          |

Clinical–pathologic characteristics of TCGA lung adenocarcinoma cohort (n=517) were evaluated in this study. \*According to the 6<sup>th</sup> and 7<sup>th</sup> edition of the TNM classification for lung cancer. *Definition of abbreviations:* ALK: Anaplastic lymphoma kinase; EGFR= epidermal growth factor receptor; MUT = mutation; NA = not applicable; pTNM stages = pathologic TNM stages of malignant tumors; TCGA = the cancer genome atlas; WT = wild type.



**Table S5.** Major Pathways in 185-gene cluster from TCGA lung adenocarcinoma cohort by IPA.

| Ingenuity Canonical Pathways -log( <i>p</i> -value)    |       | Molecules                                                                                   |
|--------------------------------------------------------|-------|---------------------------------------------------------------------------------------------|
| Matrix Metalloproteases                                | 10.46 | MMP3,ADAM12,THBS2,MMP10,MMP13,<br>MMP11,MMP12,MMP9,MMP1                                     |
| Granulocyte Adhesion and<br>Diapedesis                 | 7.55  | MMP3,CXCL13,IL1RL2,IL36RN,CXCL14,<br>MMP10,MMP13,MMP11,IL37,MMP12,<br>MMP9,MMP1             |
| HIF1 $\alpha$ Signaling                                | 6.70  | SLC2A5,MMP3,SLC2A1,EGLN3,MMP10,<br>MMP13,MMP11,MMP12,MMP9,MMP1                              |
| Agranulocyte Adhesion and<br>Diapedesis                | 6.30  | MMP3,CXCL13,IL36RN,CXCL14,MMP10,<br>MMP13,MMP11,IL37,MMP12,MMP9,MM<br>P1                    |
| Hepatic Fibrosis / Hepatic<br>Stellate Cell Activation | 6.16  | COL1A1,IL1RL2,COL10A1,COL22A1,MM<br>P13,<br>COL11A1,COL17A1,MMP9,MMP1,COL7<br>A1,<br>COL3A1 |
| Atherosclerosis Signaling                              | 5.76  | COL1A1,MMP3,IL36RN,COL10A1,MMP1<br>3,IL37,MMP9,MMP1,COL3A1                                  |
| Bladder Cancer Signaling                               | 4.63  | MMP3,MMP13,MMP10,MMP11,MMP12,<br>MMP9,MMP1<br>NGEF,ADAMTS14,MMP3,BMP8A,MMP1<br>0,           |
| Axonal Guidance Signaling                              | 4.57  | MMP13,EPHA10,ADAMDEC1,ADAM12,<br>ADAM28,MMP11,MMP12,ADAMTS16,M<br>MP9,<br>MMP1              |
| Osteoarthritis Pathway                                 | 4.02  | MMP3,IL1RL2,COL10A1,MMP10,MMP13,<br>GREM1,MMP12,MMP9,MMP1                                   |

The MMP gene signature, which contained 185 MMP related genes were determined from TCGA lung adenocarcinoma cohort for Ingenuity canonical pathways (IPA) analysis. Ingenuity canonical pathways were combined according to the major function category and gene overlap. The enrichment *p*-values were obtained by Fisher Exact Test. Pathways were ranked within the category by  $-\log(p\text{-value})$  for the pathway.  $-\log(p\text{-value}) > 1.3$  with significance at  $p=0.05$ .

**Table S6.** Major Pathways in 36-gene MMP signature by IPA.

| Ingenuity Canonical Pathways                      | $-\log(p\text{-value})$ | Molecules                                            |
|---------------------------------------------------|-------------------------|------------------------------------------------------|
| Matrix Metalloproteases                           | 14.66                   | ADAM12, MMP1, MMP3, MMP9, MMP11, MMP12, MMP13, THBS2 |
| HIF1 $\alpha$ Signaling                           | 10.27                   | EGL3, MMP1, MMP3, MMP9, MMP11, MMP12, MMP13, SLC2A1  |
| Granulocyte Adhesion and Diapedesis               | 6.35                    | MMP1, MMP3, MMP9, MMP11, MMP12, MMP13                |
| Osteoarthritis Pathway                            | 5.79                    | GREM1, MMP1, MMP3, MMP9, MMP12, MMP13                |
| Hepatic Fibrosis/Hepatic Stellate Cell Activation | 4.76                    | COL11A1, COL17A1, MMP1, MMP9, MMP13                  |
| Axonal Guidance Signaling                         | 4.70                    | ADAM12, MMP1, MMP3, MMP9, MMP11, MMP12, MMP13        |
| Oncostatin M Signaling                            | 4.21                    | MMP1, MMP3, MMP13                                    |
| Atherosclerosis Signaling                         | 4.14                    | MMP1, MMP3, MMP9, MMP13                              |

The 36-gene MMP signature, which contained overlapping genes of MMP cluster genes between GSE31210 and TCGA lung adenocarcinoma cohort was determined for Ingenuity canonical pathways (IPA) analysis. Ingenuity canonical pathways were combined according to the major function category and gene overlap. The enrichment  $p$ -values were obtained by Fisher Exact Test. Pathways were ranked within the category by  $-\log(p\text{-value})$  for the pathway.  $-\log(p\text{-value}) > 1.3$  with significance at  $p=0.05$ .

**Table S7.** Univariate and Multivariate Analysis of Progression-free and Overall Survival in 162 stage I lung adenocarcinoma.

| Variable                        | Progression-free Survival   |                |                              |                | Overall Survival            |                |                              |                |
|---------------------------------|-----------------------------|----------------|------------------------------|----------------|-----------------------------|----------------|------------------------------|----------------|
|                                 | Univariate Analysis         |                | Multivariate Analysis        |                | Univariate Analysis         |                | Multivariate Analysis        |                |
|                                 | <i>hazard ratio</i>         |                | <i>hazard ratio</i>          |                | <i>hazard ratio</i>         |                | <i>hazard ratio</i>          |                |
|                                 | (95% CI)                    | <i>P value</i> | (95% CI)                     | <i>P value</i> | (95% CI)                    | <i>P value</i> | (95% CI)                     | <i>P value</i> |
| Sex, M                          | 0.99 (0.50–1.96)            | 0.98           | 0.78 (0.33–1.83)             | 0.56           | 1.14 (0.43–3.07)            | 0.88           | 0.84 (0.23–3.03)             | 0.79           |
| Age, per 1 yr*                  | 1.01 (0.96–1.06)            | 0.67           | 0.99 (0.96–1.06)             | 0.68           | 0.99 (0.93–1.06)            | 0.73           | 0.97 (0.91–1.04)             | 0.38           |
| Stage IB vs IA                  | 3.02 (1.53–5.95)            | 0.001          | 2.18 (1.06–4.5)              | <b>0.03</b>    | 2.16 (0.81–5.78)            | 0.12           | 1.25 (0.43–3.61)             | 0.68           |
| Smoking status                  |                             |                |                              |                |                             |                |                              |                |
| Ever-smoker vs. Never-smoker    | 1.06 (0.54–2.08)            | 0.87           | 0.93 (0.39–2.23)             | 0.86           | 1.46 (0.55–3.89)            | 0.45           | 1.11 (0.30–4.02)             | 0.88           |
| Mutation status                 |                             |                |                              |                |                             |                |                              |                |
| EGFR_MUT vs. KRAS/EGFR/AKL_WT   | 0.44 (0.22–0.92)            | <b>0.029</b>   | 0.61 (0.29–1.28)             | 0.19           | 0.35 (0.13–0.96)            | <b>0.042</b>   | 0.48 (0.17–1.40)             | 0.18           |
| KRAS_MUT vs. KRAS/EGFR/AKL_WT   | 0.84 (0.28–2.55)            | 0.76           | 0.60 (0.19–1.91)             | 0.39           | 0.35 (0.04–2.80)            | 0.32           | 0.29 (0.04–2.42)             | 0.26           |
| ALK_Fusion vs. KRAS/EGFR/AKL_WT | 9.40e <sup>-7</sup> (0–Inf) | 0.99           | 1.27e <sup>-10</sup> (0–Inf) | 0.99           | 6.37e <sup>-9</sup> (0–Inf) | 0.99           | 1.44e <sup>-10</sup> (0–Inf) | 0.99           |
| MMP gene signature              |                             |                |                              |                |                             |                |                              |                |
| High vs Low                     | 3.89 (1.97–7.67)            | <b>0.04</b>    | 3.14 (1.49–6.60)             | <b>0.003</b>   | 6.43 (2.23–18.53)           | <b>0.0006</b>  | 6.00 (1.92–18.72)            | <b>0.002</b>   |

All variables were evaluated among the 162 patients with lung adenocarcinoma (6 patients excluded from 168 patients from GSE31210 cohort due to exclude for prognosis analysis due to incomplete resection or adjuvant therapy).

Factors associated with PFS and OS in univariate and multivariate Cox regression model (n=162 patients). The HR (95%CI) and *P* value are shown for each. *P* value <0.05 are set in bold for emphasis.

\*Additional risk with each additional year of age.

*Definition of abbreviations:* ALK = Anaplastic lymphoma kinase; EGFR=epidermal growth factor receptor; Inf = Infinite; KRAS=Kirsten rat sarcoma 2 viral oncogene homolog; MMP=metalloproteinase; MUT=mutation; WT= wild type.

**Table S8.** Clinical Characteristics of GSE30219 Stage I Lung Adenocarcinoma Cohort .

| Characteristics        | N (%)         |
|------------------------|---------------|
| Subjects, <i>n</i>     | 70            |
| Sex, M/F, <i>n</i> (%) | 54/16 (77/23) |
| Age, yr, mean $\pm$ SD | 61 $\pm$ 9    |
| pTNM stages            |               |
| T1N0M0                 | 70 (100)      |
| Tobacco                | 7             |
| Never-smoker           | 75 (7)        |
| Former-smoker          | 34 (49)       |
| Active-smoker          | 30 (43)       |
| NA                     | 1 (1)         |
| <i>TP53</i> mutation   |               |
| WT                     | 42 (60)       |
| MUT                    | 25 (36)       |
| NA                     | 3 (4)         |
| Adjuvant chemotherapy  |               |
| No                     | 68 (97)       |
| Yes                    | 0 (0)         |
| NA                     | 2 (3)         |
| Adjuvant radiotherapy  |               |
| No                     | 69 (99)       |
| Yes                    | 0 (0)         |
| NA                     | 1 (1)         |

Clinical–pathologic characteristics of GSE30219 lung adenocarcinoma cohort (n=70) were evaluated in this study. \*According to the 7th edition of the TNM classification for lung cancer. Definition of abbreviations: MUT = mutation; NA = not applicable; pTNM stages = pathologic TNM stages of malignant tumors; WT = wild type.
